# Supplementary material for: Is there indirect selection on female extra‐pair reproduction through cross‐sex genetic correlations with male reproductive fitness?
Source: PubMed Central journal article supplement (PMC6121835; doi:10.1002/evl3.56), 2018-06-15

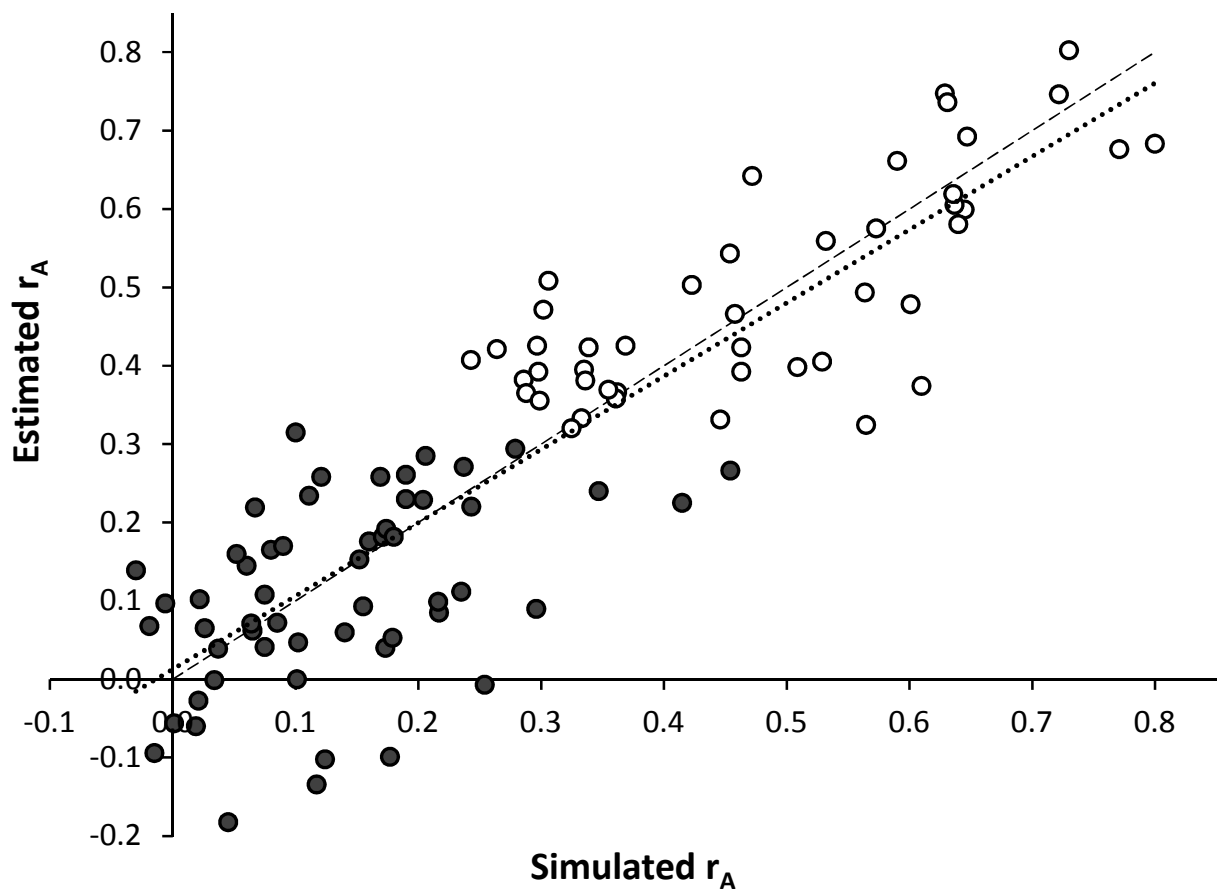

Supplement: EVL3-2-159-s001.pdf [file EVL3-2-159-s001.pdf]
